# Supplementary material
Source: Research Square preprint supplement (doi:10.21203/rs.3.rs-9208878/v1)
Supplement: Supplementary file 1 [file d9e2f754aa3196f84d726a0c.docx]

**Supplementary Materials**

**Table S1. Primers used for qRT-PCR**

| primer name | sequence(5’-3’) |
| --- | --- |
| *wnt7* | F: GCTGCTTTCACCTACGCTGTCA |
|  | R: CCACTTCCATCCCTCCTCCTG |
| *fzd10* | F:TGATGGACAGCACGGGAACG |
|  | R:TGACGGAGCAGCACCACAGG |
| *myc1b* | F:CTTCGCCGTCTAAAGGGTAT |
|  | R:CGTCCTCCTTAGCAGATTCAC |
| *apla* | F:GAACCAGAGGCACGAATACC |
|  | R:GCAAACACCACCACCAGAGT |
| *aplb* | F:CTTCCTCTACGCCTTCTTTG |
|  | R:ACTGAGCCTCTGTCTTCTGG |
| *cebpa* | F:CGACTTCCTGGCGGACCTGTT |
|  | R:CGGCGGGTTGTGCTCGTAGA |
| 18S rRNA | F: GACAAATCGCTCCACCAACT |
|  | R CCTGCGGCTTAATTTGACCC |

**Fig. S1** Correlation between qRT-PCR and RNA-seq results (R = 0.875).
